# Supplementary material for: Rad21 is the core subunit of the cohesin complex involved in directing genome organization
Source: Research Square preprint supplement (doi:10.21203/rs.3.rs-1120640/v1), 2021-12-14
Supplement: Supplementary file 2 [file 8aaed2ae037f0fd069acbb31.pdf]

GEO accession numbers:

The accession number is GSE183186 and reviewer token is "cjmromamlrefver".
